# Supplementary material for: Microparticles vs. Macroparticles as Curcumin Delivery Vehicles: Structural Studies and Cytotoxic Effect in Human Adenocarcinoma Cell Line (LoVo)
Source: MDPI journal article supplement (doi:10.3390/molecules26196056), 2021-10-06
Supplement: s1 [file s1]

## S1. Methods

### S1.2 UV-Vis analysis

CUR was extracted from wet CA10UM and CA10UX with acetone (1:500, w/v) (48 h, 500 RPM, room temperature). Then, the solutions were filtered, the solvent was evaporated, and CUR<sub>CA10UM</sub> and CUR<sub>CA10UX</sub> were again dissolved in acetone to receive a concentration of 10 µg/ml. CUR<sub>REF</sub> (a reference substance) was dissolved in acetone (C = 10 µg/ml). The UV-Vis spectra were recorded (U-2900, Hitachi, Japan) (300 – 1000 nm, RT, quartz cuvette).

## S2. Results

### S2.1 Spectroscopic studies – UV-Vis

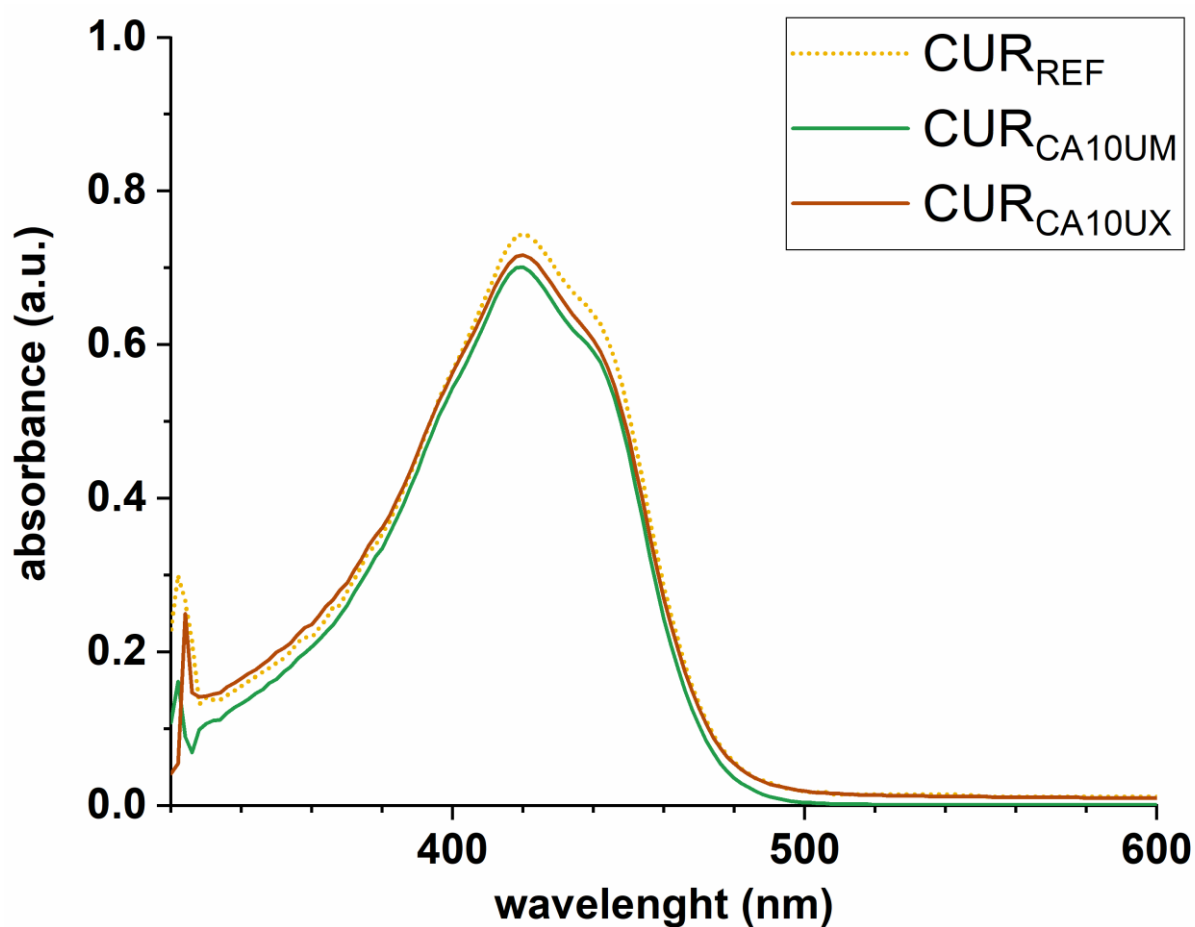

**Figure S1.** UV-Vis spectra recorded for CUR dissolved in acetone (C = 10 µg/ml) and extracted from CA10UM and CA10UX particles.

## S2.2 Curcumin release kinetic studies

**Table S1.** Kinetic parameters of hybrid (H) and Korsmeyer-Peppas (KP) models estimated from the fitting to experimental data received during the simulated gastric fluid (SGF) stage of in vitro release of CUR. Bold type indicates the best fit.

| particle | H-model     |                |                |             |              | KP-model       |             |              |
|----------|-------------|----------------|----------------|-------------|--------------|----------------|-------------|--------------|
|          | $M_{H1}$    | $k_{H1}$       | $k_{H2}$       | $n_{H1}$    | $R_{H1}^2$   | $k_{KP1}$      | $n_{KP1}$   | $R_{KP1}^2$  |
| CA10UM   | <b>3.01</b> | <b>3.4E-04</b> | <b>3.6E-06</b> | <b>2.90</b> | <b>0.952</b> | 2.5E-01        | 0.73        | 0.944        |
| CA15UM   | <b>0.22</b> | <b>1.3E-02</b> | <b>2.6E-01</b> | <b>0.86</b> | <b>0.996</b> | 5.1E-01        | 0.59        | 0.966        |
| CA20UM   | <b>0.00</b> | <b>5.0E-02</b> | <b>5.3E-07</b> | <b>3.87</b> | <b>0.961</b> | 4.8E-03        | 1.59        | 0.836        |
| CA10CM   | 0.06        | 7.0E-03        | 3.9E-02        | 1.22        | 0.821        | <b>7.4E-02</b> | <b>1.14</b> | <b>0.910</b> |
| CA15CM   | 0.31        | 3.0E-03        | 7.9E-06        | 2.12        | 0.977        | <b>9.4E-02</b> | <b>1.02</b> | <b>0.988</b> |
| CA20CM   | 0.21        | 1.3E-03        | 2.7E-02        | 0.97        | 0.749        | <b>8.6E-02</b> | <b>1.06</b> | <b>0.979</b> |
| CA10GM   | <b>0.03</b> | <b>6.1E+01</b> | <b>9.8E-02</b> | <b>1.04</b> | <b>0.968</b> | 9.1E-01        | 0.55        | 0.953        |
| CA15GM   | <b>0.01</b> | <b>1.3E+07</b> | <b>1.2E-14</b> | <b>6.69</b> | <b>0.901</b> | 6.2E-01        | 0.17        | 0.566        |
| CA20GM   | <b>0.01</b> | <b>1.2E-01</b> | <b>2.0E-16</b> | <b>7.02</b> | <b>0.981</b> | 4.0E-01        | 0.21        | 0.910        |
| CA10UX   | <b>0.07</b> | <b>1.0E-03</b> | <b>1.7E-04</b> | <b>0.87</b> | <b>0.979</b> | 3.2E-02        | 0.66        | 0.780        |
| CA15UX   | <b>0.01</b> | <b>1.7E-01</b> | <b>1.5E-08</b> | <b>3.43</b> | <b>0.978</b> | 1.1E-01        | 0.33        | 0.958        |
| CA20UX   | <b>0.01</b> | <b>4.4E+02</b> | <b>6.1E-04</b> | <b>1.84</b> | <b>0.969</b> | 8.4E-02        | 0.86        | 0.820        |
| CA10CX   | 0.00        | 1.2E-08        | 9.9E-04        | 1.91        | 0.827        | <b>2.9E-04</b> | <b>2.17</b> | <b>0.917</b> |
| CA15CX   | 0.01        | 1.3E-01        | 1.1E-02        | 0.97        | 0.857        | <b>1.2E-01</b> | <b>0.86</b> | <b>0.926</b> |
| CA20CX   | <b>0.00</b> | <b>5.4E-02</b> | <b>5.1E-18</b> | <b>7.57</b> | <b>0.991</b> | 8.9E-02        | 0.37        | 0.927        |
| CA10GX   | <b>0.00</b> | <b>2.0E+10</b> | <b>3.8E-04</b> | <b>2.72</b> | <b>0.956</b> | 2.0E-01        | 0.13        | 0.845        |
| CA15GX   | <b>0.00</b> | <b>5.0E-02</b> | <b>3.8E-05</b> | <b>2.12</b> | <b>0.962</b> | 1.3E-03        | 1.23        | 0.937        |
| CA20GX   | <b>0.01</b> | <b>1.0E-03</b> | <b>1.0E-03</b> | <b>0.89</b> | <b>0.854</b> | 1.0E-03        | 1.32        | 0.484        |

**Table S2.** Kinetic parameters of hybrid (H) and Korsmeyer-Peppas (KP) models estimated from the fitting to experimental data received during the simulated intestinal fluid (SIF) stage of in vitro release of CUR. Bold type indicates the best fit.

| particle | H-model      |                |                |             |              | KP-model       |             |              |
|----------|--------------|----------------|----------------|-------------|--------------|----------------|-------------|--------------|
|          | $M_{H2}$     | $k_{H3}$       | $k_{H4}$       | $n_{H2}$    | $R_{H2}^2$   | $k_{KP2}$      | $n_{KP2}$   | $R_{KP2}^2$  |
| CA10UM   | <b>0.005</b> | <b>1.0E-03</b> | <b>7.5E-04</b> | <b>1.30</b> | <b>0.989</b> | 7.6E-03        | 0.86        | 0.922        |
| CA15UM   | <b>0.005</b> | <b>1.0E-03</b> | <b>3.8E-03</b> | <b>0.87</b> | <b>0.975</b> | 5.2E-02        | 0.34        | 0.903        |
| CA20UM   | <b>0.005</b> | <b>1.0E-03</b> | <b>1.8E-03</b> | <b>1.04</b> | <b>0.950</b> | 2.4E-02        | 0.54        | 0.861        |
| CA10CM   | 0.005        | 1.0E-03        | 1.7E-01        | 0.33        | 0.831        | <b>2.8E-01</b> | <b>0.27</b> | <b>0.891</b> |
| CA15CM   | 0.005        | 1.0E-03        | 1.3E-01        | 0.35        | 0.867        | <b>2.1E-01</b> | <b>0.29</b> | <b>0.908</b> |
| CA20CM   | 0.005        | 1.0E-03        | 5.0E-02        | 0.57        | 0.924        | <b>3.2E-02</b> | <b>0.42</b> | <b>0.984</b> |
| CA10GM   | <b>0.005</b> | <b>1.0E-03</b> | <b>1.0E-05</b> | <b>2.16</b> | <b>0.965</b> | 8.8E-03        | 0.80        | 0.674        |
| CA15GM   | <b>0.005</b> | <b>1.0E-03</b> | <b>2.9E-04</b> | <b>1.46</b> | <b>0.993</b> | 1.4E-03        | 1.12        | 0.964        |
| CA20GM   | <b>0.005</b> | <b>1.0E-03</b> | <b>2.9E-03</b> | <b>0.86</b> | <b>0.996</b> | 6.3E-03        | 0.67        | 0.992        |
| CA10UX   | <b>0.005</b> | <b>1.0E-03</b> | <b>5.6E-04</b> | <b>1.38</b> | <b>0.976</b> | 6.8E-04        | 1.34        | 0.974        |
| CA15UX   | <b>0.005</b> | <b>1.0E-03</b> | <b>1.0E-05</b> | <b>2.14</b> | <b>0.967</b> | 1.6E-06        | 2.56        | 0.963        |
| CA20UX   | <b>0.005</b> | <b>1.0E-03</b> | <b>2.3E-05</b> | <b>1.72</b> | <b>0.988</b> | 3.5E-02        | 0.23        | 0.622        |
| CA10CX   | <b>0.005</b> | <b>1.0E-03</b> | <b>4.3E-03</b> | <b>1.10</b> | <b>0.882</b> | 5.0E-03        | 1.08        | 0.851        |
| CA15CX   | <b>0.005</b> | <b>1.0E-03</b> | <b>3.6E-05</b> | <b>2.12</b> | <b>0.894</b> | 1.1E-06        | 2.85        | 0.854        |
| CA20CX   | <b>0.005</b> | <b>1.0E-03</b> | <b>1.0E-05</b> | <b>2.32</b> | <b>0.955</b> | 2.4E-08        | 3.59        | 0.993        |
| CA10GX   | 0.005        | 1.0E-03        | 1.0E-05        | 2.39        | 0.980        | <b>1.8E-07</b> | <b>3.25</b> | <b>0.996</b> |

|        |              |                |                |             |              |                |             |              |
|--------|--------------|----------------|----------------|-------------|--------------|----------------|-------------|--------------|
| CA15GX | <b>0.005</b> | <b>1.0E-03</b> | <b>1.7E-04</b> | <b>1.70</b> | <b>0.928</b> | 1.4E-05        | 2.19        | 0.876        |
| CA20GX | 0.005        | 1.0E-03        | 1.0E-05        | 2.09        | 0.790        | <b>1.2E-08</b> | <b>3.53</b> | <b>0.944</b> |

**Table S3.** Kinetic parameters of hybrid (H) and Korsmeyer-Peppas (KP) models estimated from the fitting to experimental data received during the simulated colon fluid (SCF) stage of in vitro release of CUR. Bold type indicates the best fit.

| particle | H-model      |                |                |             |              | KP-model       |             |              |
|----------|--------------|----------------|----------------|-------------|--------------|----------------|-------------|--------------|
|          | $M_{H3}$     | $k_{H5}$       | $k_{H6}$       | $n_{H3}$    | $R_{H3}^2$   | $k_{KP3}$      | $n_{KP3}$   | $R_{KP3}^2$  |
| CA10UM   | 0.005        | 1.0E-03        | 3.3E-02        | 0.58        | 0.990        | <b>4.7E-01</b> | <b>0.14</b> | <b>0.997</b> |
| CA15UM   | 0.005        | 1.0E-03        | 6.9E-02        | 0.43        | 0.948        | <b>3.1E-01</b> | <b>0.21</b> | <b>0.997</b> |
| CA20UM   | 0.005        | 1.0E-03        | 1.7E-05        | 1.92        | 0.975        | <b>2.9E-01</b> | <b>0.08</b> | <b>0.972</b> |
| CA10CM   | 0.005        | 1.0E-03        | 1.0E-02        | 0.46        | 0.957        | <b>8.8E-01</b> | <b>0.02</b> | <b>0.999</b> |
| CA15CM   | 0.005        | 1.0E-03        | 2.0E-04        | 1.46        | 0.986        | <b>7.6E-01</b> | <b>0.04</b> | <b>0.993</b> |
| CA20CM   | 0.005        | 1.0E-03        | 3.2E-03        | 0.65        | 0.962        | <b>7.3E-01</b> | <b>0.02</b> | <b>0.999</b> |
| CA10GM   | <b>0.005</b> | <b>1.0E-03</b> | <b>2.6E-04</b> | <b>1.41</b> | <b>0.971</b> | 4.1E-01        | 0.08        | 0.662        |
| CA15GM   | <b>0.005</b> | <b>1.0E-03</b> | <b>4.2E-02</b> | <b>0.86</b> | <b>0.991</b> | 3.3E-01        | 0.15        | 0.990        |
| CA20GM   | <b>0.005</b> | <b>1.0E-03</b> | <b>3.1E-03</b> | <b>1.04</b> | <b>0.943</b> | 6.6E-02        | 0.42        | 0.842        |
| CA10UX   | 0.005        | 1.0E-03        | 2.5E-02        | 0.59        | 0.990        | <b>4.0E-01</b> | <b>0.14</b> | <b>0.997</b> |
| CA15UX   | 0.005        | 1.0E-03        | 8.7E-03        | 0.77        | 0.966        | <b>2.9E-01</b> | <b>0.14</b> | <b>0.983</b> |
| CA20UX   | 0.005        | 1.0E-03        | 1.5E-02        | 0.65        | 0.907        | <b>1.1E-01</b> | <b>0.29</b> | <b>0.968</b> |
| CA10CX   | 0.005        | 1.0E-03        | 2.0E-02        | 0.46        | 0.920        | <b>8.2E-01</b> | <b>0.04</b> | <b>0.999</b> |
| CA15CX   | 0.005        | 1.0E-03        | 3.3E-03        | 0.75        | 0.988        | <b>8.5E-01</b> | <b>0.02</b> | <b>0.999</b> |
| CA20CX   | 0.005        | 1.0E-03        | 1.0E-05        | 2.01        | 0.984        | <b>7.0E-01</b> | <b>0.03</b> | <b>0.994</b> |
| CA10GX   | na           | na             | na             | na          | na           | na             | na          | na           |
| CA15GX   | 0.005        | 1.0E-03        | 7.6E-02        | 0.37        | 0.874        | <b>5.3E-01</b> | <b>0.12</b> | <b>0.995</b> |
| CA20GX   | 0.005        | 1.0E-03        | 1.6E-01        | 0.33        | 0.824        | <b>4.4E-01</b> | <b>0.18</b> | <b>0.966</b> |

**Table S4.** One-way ANOVA multiple comparison results; red colour denotes statistically significant differences;

**a) comparisons between different concentrations of sodium alginate (2.0 % vs. 1.5 % vs. 1.0 %):**

|                                   |            |                    |                  |         |                  |
|-----------------------------------|------------|--------------------|------------------|---------|------------------|
| Number of families                | 1          |                    |                  |         |                  |
| Number of comparisons per family  | 3          |                    |                  |         |                  |
| Alpha                             | 0,05       |                    |                  |         |                  |
| Tukey's multiple comparisons test | Mean Diff, | 95,00% CI of diff, | Below threshold? | Summary | Adjusted P Value |
| 20 vs. 15                         | 3,674      | -7,624 to 14,97    | No               | ns      | 0,7245           |
| 20 vs. 10                         | 8,335      | -2,808 to 19,48    | No               | ns      | 0,1845           |
| 15 vs. 10                         | 4,661      | -4,785 to 14,11    | No               | ns      | 0,4772           |

**b) comparisons between different types of particles (macro- and microparticles uncoated, coated with chitosan or coated with gelatin;**

**UM vs. UX vs. CM vs. CX vs. GM vs. GX):**

|                                   |            |                    |                  |         |                  |     |
|-----------------------------------|------------|--------------------|------------------|---------|------------------|-----|
| Number of families                | 1          |                    |                  |         |                  |     |
| Number of comparisons per family  | 15         |                    |                  |         |                  |     |
| Alpha                             | 0,05       |                    |                  |         |                  |     |
| Tukey's multiple comparisons test | Mean Diff, | 95,00% CI of diff, | Below threshold? | Summary | Adjusted P Value |     |
| UM vs. UX                         | -7,402     | -23,96 to 9,158    | No               | ns      | 0,7954           | A-B |
| UM vs. CM                         | -7,043     | -24,80 to 10,71    | No               | ns      | 0,8657           | A-C |
| UM vs. CX                         | -25,12     | -41,98 to -8,270   | Yes              | ***     | 0,0004           | A-D |
| UM vs. GM                         | 6,855      | -10,99 to 24,70    | No               | ns      | 0,8809           | A-E |
| UM vs. GX                         | -11,11     | -27,96 to 5,743    | No               | ns      | 0,4107           | A-F |
| UX vs. CM                         | 0,3585     | -16,71 to 17,43    | No               | ns      | >0,9999          | B-C |
| UX vs. CX                         | -17,72     | -33,85 to -1,588   | Yes              | *       | 0,0219           | B-D |
| UX vs. GM                         | 14,26      | -2,910 to 31,42    | No               | ns      | 0,1662           | B-E |
| UX vs. GX                         | -3,708     | -19,84 to 12,42    | No               | ns      | 0,9862           | B-F |
| CM vs. CX                         | -18,08     | -35,43 to -0,7241  | Yes              | *       | 0,0356           | C-D |
| CM vs. GM                         | 13,90      | -4,422 to 32,22    | No               | ns      | 0,2527           | C-E |
| CM vs. GX                         | -4,066     | -21,42 to 13,29    | No               | ns      | 0,9850           | C-F |
| CX vs. GM                         | 31,98      | 14,53 to 49,43     | Yes              | ****    | <0,0001          | D-E |

|           |        |                   |     |    |        |     |
|-----------|--------|-------------------|-----|----|--------|-----|
| CX vs. GX | 14,01  | -2,420 to 30,45   | No  | ns | 0,1443 | D-F |
| GM vs. GX | -17,96 | -35,41 to -0,5151 | Yes | *  | 0,0394 | E-F |

**c) comparisons between different types of macroparticles (uncoated, coated with chitosan or coated with gelatin; UX vs. CX vs. GX):**

|                                   |            |                    |                  |         |                  |     |
|-----------------------------------|------------|--------------------|------------------|---------|------------------|-----|
| Number of families                | 1          |                    |                  |         |                  |     |
| Number of comparisons per family  | 3          |                    |                  |         |                  |     |
| Alpha                             | 0,05       |                    |                  |         |                  |     |
| Tukey's multiple comparisons test | Mean Diff, | 95,00% CI of diff, | Below threshold? | Summary | Adjusted P Value |     |
| UX vs. CX                         | -17,72     | -30,84 to -4,598   | Yes              | **      | 0,0047           | B-D |
| UX vs. GX                         | -3,708     | -16,83 to 9,415    | No               | ns      | 0,7827           | B-F |
| CX vs. GX                         | 14,01      | 0,6459 to 27,38    | Yes              | *       | 0,0375           | D-F |

**d) comparisons between different types of microparticles (uncoated, coated with chitosan or coated with gelatin; UM vs. CM vs. GM):**

|                                   |            |                    |                  |         |                  |     |
|-----------------------------------|------------|--------------------|------------------|---------|------------------|-----|
| Number of families                | 1          |                    |                  |         |                  |     |
| Number of comparisons per family  | 3          |                    |                  |         |                  |     |
| Alpha                             | 0,05       |                    |                  |         |                  |     |
| Tukey's multiple comparisons test | Mean Diff, | 95,00% CI of diff, | Below threshold? | Summary | Adjusted P Value |     |
| UM vs. CM                         | -7,043     | -21,93 to 7,848    | No               | ns      | 0,5038           | A-C |
| UM vs. GM                         | 6,855      | -8,113 to 21,82    | No               | ns      | 0,5257           | A-E |
| CM vs. GM                         | 13,90      | -1,469 to 29,26    | No               | ns      | 0,0852           | C-E |
